# Supplementary material for: Public Awareness and Perceptions of Invasive Alien Species in Small Towns
Source: Biology (Basel). 2021 Dec 14;10(12):1322. doi: 10.3390/biology10121322 (PMC8698633; doi:10.3390/biology10121322)
Supplement: Supplementary file 1 [file biology-10-01322-s001.zip › biology-1481044-supplementary.pdf]

Supplementary information S1: Questionnaire directed to participants. Draft versions of the questionnaire were jointly developed by the authors and pilot tested prior to the survey. We conducted face-to face surveys between 2018 and 2019.

## Questionnaire

1. Do you know what an invasive alien species is? [yes] [no] [unsure]: If yes, describe what is Invasive alien species  
.....  
.....  
.....
2. Can you name any invasive alien species? [yes] [no]: If yes, list the ones they mention  
.....  
.....  
.....
3. Do you know what an indigenous species is? [yes] [no] [unsure]: If yes, describe what is an indigenous species  
.....  
.....  
.....
4. Can you name any indigenous species? [yes] [no]: If yes list the first 5 they mention  
.....  
.....  
.....
5. Would you like to learn more about Invasive species and their impacts? [yes] [no] [unsure] [not interested]
6. How would you categorise your knowledge of invasive and indigenous flora? [very good] [good] [average] [poor] [very poor] [don't know]

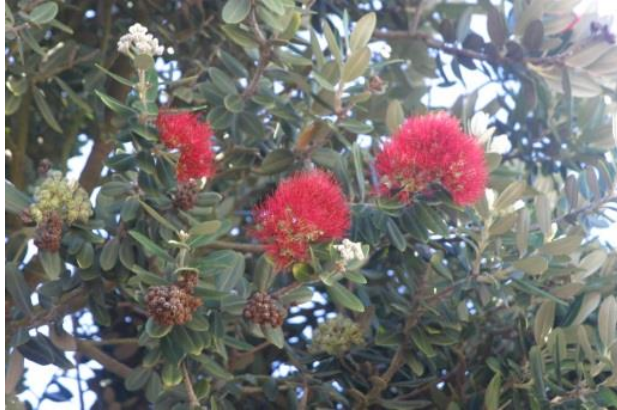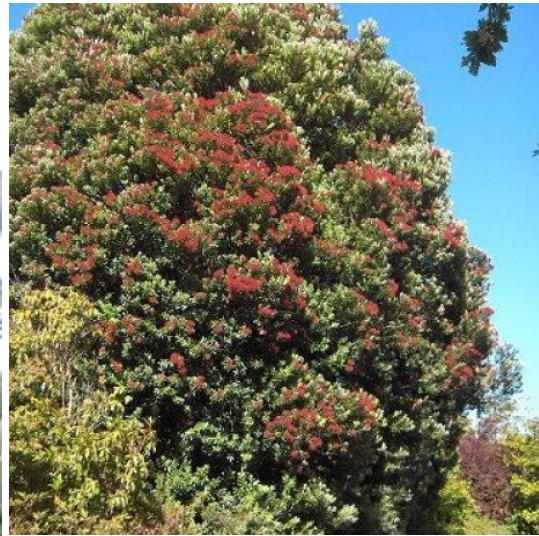

- 6.1. Can you identify this plant? [yes] [no]: if yes, give name of the plant  
 ..... and continue,  
 if no skip rest
- 6.2. Is it invasive or indigenous?  
 .....
- 6.3. Have you personally seen this plant? [yes] [no] [not sure]
- 6.4. Is it [very common] [common] [moderate] [scarce] [very scarce] in your area?
- 6.5. Is it spreading and increasing in your area? [yes] [no] [same] [don't know]
- 6.6. Is this plant [beneficial] [harmful] [no impact] or [both harmful and beneficial]?  
 Reason for answer

.....  
 .....

.....  
 .....

- 6.7. Where did you learn about these benefits or impacts? [personal observation]  
 [verbal communication] [school/university] [the media] [the internet] [other –  
 specify]

.....  
 .....

.....  
.....

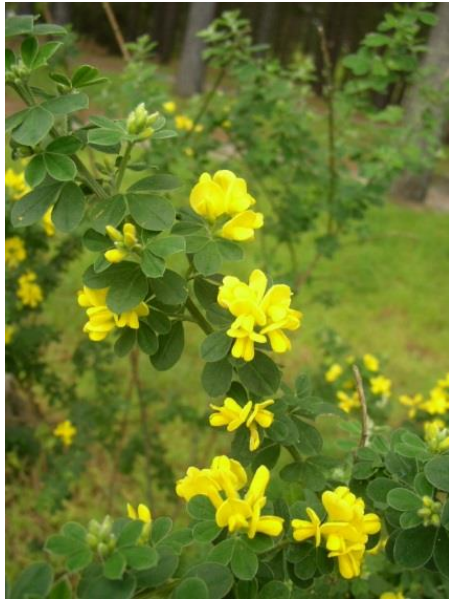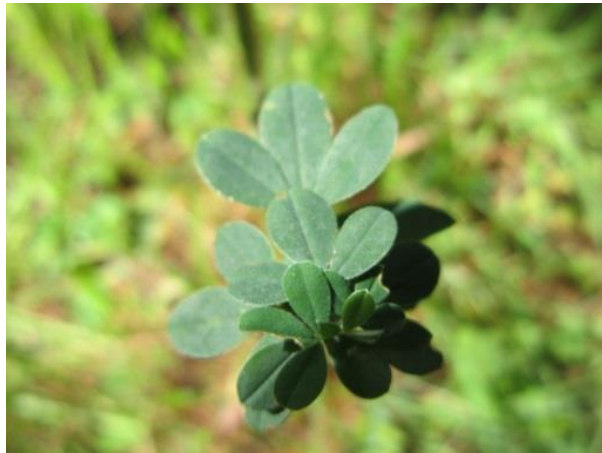

- 6.1. Can you identify this plant? [yes] [no]: if yes, give name of the plant  
..... and continue,  
if no skip rest
- 6.2. Is it invasive or indigenous?  
.....
- 6.3. Have you personally seen this plant? [yes] [no] [not sure]
- 6.4. Is it [very common] [common] [moderate] [scarce] [very scarce] in your area?
- 6.5. Is it spreading and increasing in your area? [yes] [no] [same] [don't know]
- 6.6. Is this plant [beneficial] [harmful] [no impact] or [both harmful and beneficial]?  
Reason for answer

.....  
.....

.....

.....

6.7. Where did you learn about these benefits or impacts? [personal observation]  
[verbal communication] [school/university] [the media] [the internet] [other –  
specify]

.....

.....

.....

.....

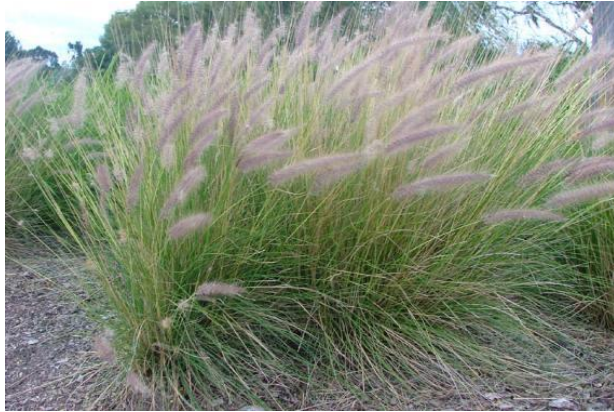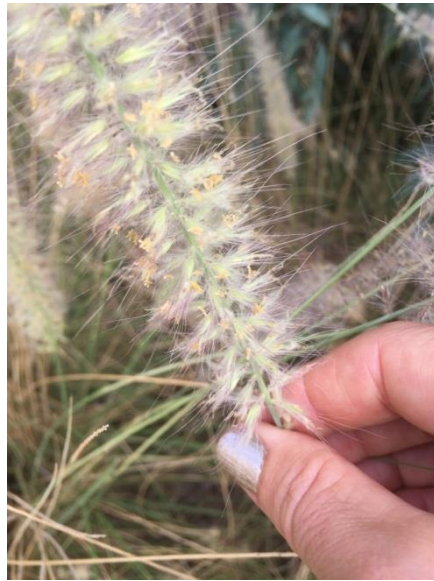

6.1. Can you identify this plant? [yes] [no]: if yes, give name of the plant  
 ..... and continue,  
 if no skip rest

6.2. Is it invasive or indigenous?  
 .....

6.3. Have you personally seen this plant? [yes] [no] [not sure]

6.4. Is it [very common] [common] [moderate] [scarce] [very scarce] in your area?

6.5. Is it spreading and increasing in your area? [yes] [no] [same] [don't know]

6.6. Is this plant [beneficial] [harmful] [no impact] or [both harmful and beneficial]?

Reason for answer

.....

.....

.....

.....

6.7. Where did you learn about these benefits or impacts? [personal observation]  
 [verbal communication] [school/university] [the media] [the internet] [other –  
 specify]

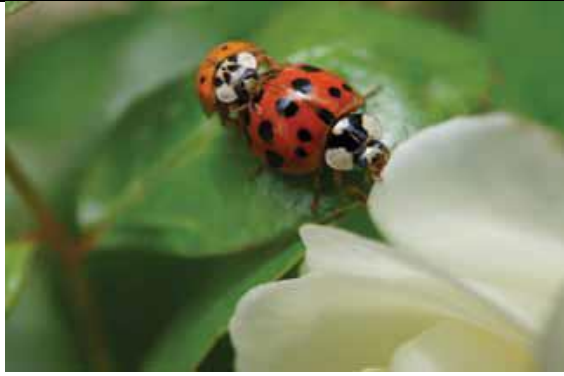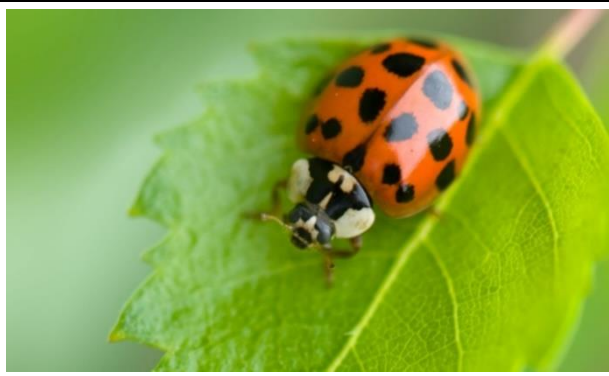

6.1. Can you identify this animal? [yes] [no]: if yes, give name of this animal  
..... and continue,  
if no skip rest

6.2. Is it invasive or indigenous?  
.....

6.3. Have you personally seen this animal? [yes] [no] [not sure]

6.4. Is it [very common] [common] [moderate] [scarce] [very scarce] in your area?

6.5. Is it spreading and increasing in your area? [yes] [no] [same] [don't know]

6.6. Is this animal [beneficial] [harmful] [no impact] or [both harmful and beneficial]?  
Reason for answer

.....  
.....  
.....  
.....

6.7. Where did you learn about these benefits or impacts? [personal observation]  
[verbal communication] [school/university] [the media] [the internet] [other –  
specify]

.....  
.....

.....  
.....

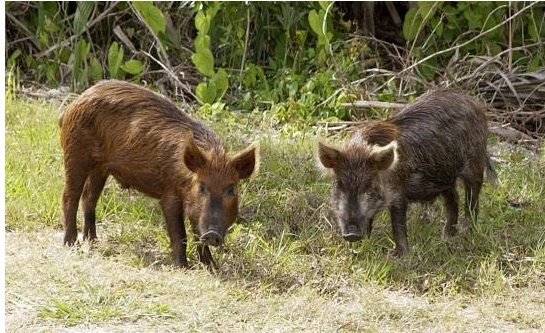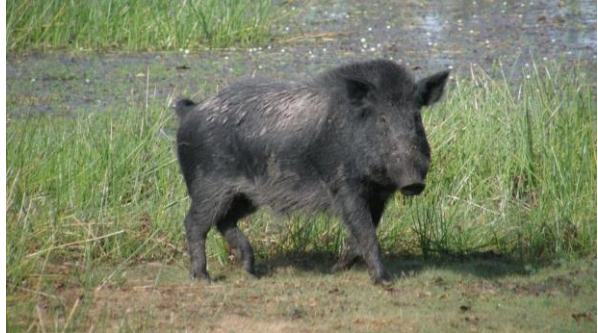

- 6.1. Can you identify this animal? [yes] [no]: if yes, give name of this animal  
..... and continue,  
if no skip rest
- 6.2. Is it invasive or indigenous?  
.....
- 6.3. Have you personally seen this animal? [yes] [no] [not sure]
- 6.4. Is it [very common] [common] [moderate] [scarce] [very scarce] in your area?
- 6.5. Is it spreading and increasing in your area? [yes] [no] [same] [don't know]
- 6.6. Is this animal [beneficial] [harmful] [no impact] or [both harmful and beneficial]?  
Reason for answer

.....  
.....

.....  
.....

6.7. Where did you learn about these benefits or impacts? [personal observation]  
[verbal communication] [school/university] [the media] [the internet] [other –  
specify]

.....

.....

.....

.....

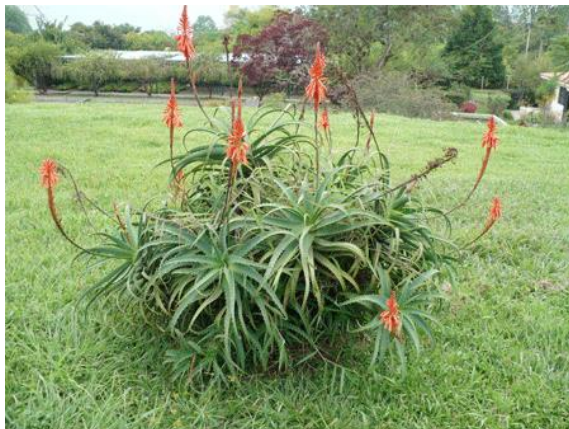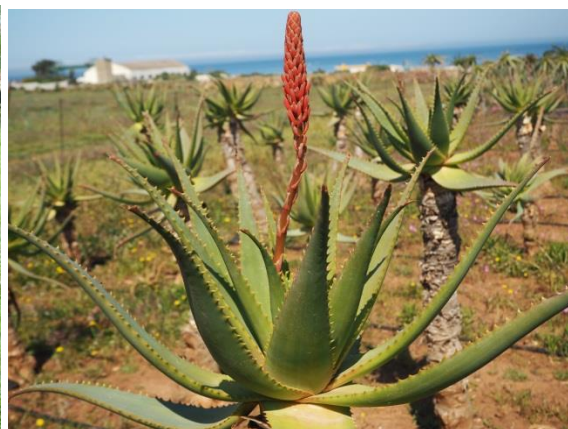

- 6.1. Can you identify this plant? [yes] [no]: if yes, give name of the plant  
..... and continue,  
if no skip rest
- 6.2. Is it invasive or indigenous?  
.....
- 6.3. Have you personally seen this plant? [yes] [no] [not sure]
- 6.4. Is it [very common] [common] [moderate] [scarce] [very scarce] in your area?
- 6.5. Is it spreading and increasing in your area? [yes] [no] [same] [don't know]

6.6. Is this plant [beneficial] [harmful] [no impact] or [both harmful and beneficial]?

Reason for answer

.....

.....

.....

.....

6.7. Where did you learn about these benefits or impacts? [personal observation]  
[verbal communication] [school/university] [the media] [the internet] [other –  
specify]

.....

.....

.....

.....

6. Have you ever seen any articles with information about invasive alien species? [yes]  
[no], If yes, where?

.....

7. Would you like to see invasive species removed and densities decreased in your area?  
[yes] [no] [unsure] [don't care] Reason:

.....

.....

8. Have you ever removed invasive species? [yes] [no] if yes, which ones and where?

.....

- .....  
 .....
9. Do you know of any volunteer campaigns that manage/control IAS in your area? [yes] [no] if yes, which ones?  
 .....  
 .....  
 .....
10. Have you ever volunteered to manage IAS? [yes] [no], If no, would you like to join groups that manage/control IAS in your area? [yes] [no]
11. Have you heard of [iNaturalist/iSpot] [SAPIA] [City of Cape Town EDRR Face book page] [SANBI's Biological Invasion Directorate/Invasive species programme] [ Working for Water] [Cape Nature] [SANParks]?
12. Have you ever reported the localities of invasive species? [yes] [no]: If yes in which platform do you report these localities to? [SAPIA] [iNaturalist] [City of Cape Town Face Book Page] [SANBI's Biological Invasion Directorate] [Working for Water] [SANParks] [Cape Nature] [report them to someone you know that works for these organisations] [you don't report them]. How many times in the past year you reported? [1-5][5-10][10-15][15-25][25-35][35-50] [more than 50 times] Name five species you reported  
 .....  
 .....  
 .....If no, would you be interested in learning how to report the localities of Invasive alien species? [yes] [no]. Reason:  
 .....  
 .....
13. Would you be happy to receive published information on Invasive alien species? [yes] [no] [only on certain species]. Reason  
 .....  
 ....

## Demographic

1. Name: .....
2. Gender [M][F]
3. Age .....
4. Ethnic group .....
5. Location .....
6. Residency time in this location: [Born here] [> 20 years] [10-20 years] [ 5-10 years] [1-5 years] [<1 year]
7. Education level.....
8. Current or previous field of work
9. Contact details:  
.....

Supplementary information file S2: A short description of the selected IAS: *Metrosideros excelsa*, *Genista monspessulana*, *Pennisetum setaceum*, *Harmonia axyridis* and *Sus scrofa*.

Indigenous species: *Aloe arborescens*

| Species name                                    | Native range                                                 | Growth form         | Impact                                                                                                                                                       |
|-------------------------------------------------|--------------------------------------------------------------|---------------------|--------------------------------------------------------------------------------------------------------------------------------------------------------------|
| <i>Metrosideros excelsa</i> Sol. ex Gaertn      | New Zealand                                                  | Tree                | It is a problematic invader, displacing fynbos vegetation.                                                                                                   |
| <i>Genista monspessulana</i> (L.) L.A.S.Johnson | Europe                                                       | Shrub               | <i>G. monspessulana</i> forms dense monospecific stands, increases the fuel load for fires and displaces native species.                                     |
| <i>Pennisetum setaceum</i> (Forssk.) Chiov.     | North African arid Mediterranean area of the Atlas Mountains | Grass               | <i>Pennisetum setaceum</i> is a highly aggressive pioneer and fire-adapted species that readily outcompetes native plants                                    |
| <i>Harmonia axyridis</i> Pallas                 | eastern Asia                                                 | Invertebrate animal | <i>Harmonia axyridis</i> outcompete and displace native ladybird species,                                                                                    |
| <i>Sus scrofa</i> Linnaeus                      | Eurosia                                                      | Vertebrate animal   | <i>Sus scrofa</i> destroy crops and pasture and habitat for indigenous plants and animals. They spread environmental weeds and could spread exotic diseases. |
| <i>Aloe arborescens</i> Mill.                   | South Africa                                                 | Shrub - tree        |                                                                                                                                                              |

Supplementary information S3 – Table S1: showing different linear models tried to assess if knowledge of *Metrosideros excelsa* is correlated with plant densities in different towns. The models are ordered by their relative AIC and the best selected one is highlighted in bold.

| Model number | Model description                                                     | Log likelihoods | Number of parameters | delta.aics | Weight (wi)     |
|--------------|-----------------------------------------------------------------------|-----------------|----------------------|------------|-----------------|
| <b>1</b>     | <b>Metrosideros_ID ~ Residency + Education + Metrosideros_Density</b> | <b>-92.7919</b> | <b>12</b>            | <b>0</b>   | <b>0.323173</b> |

|   |                                                          |          |   |          |          |
|---|----------------------------------------------------------|----------|---|----------|----------|
| 2 | Metrosideros_ID ~<br>Education +<br>Metrosideros_Density | -97.121  | 8 | 0.657984 | 0.232571 |
| 3 | Metrosideros_ID ~<br>Education                           | -98.2583 | 7 | 0.932913 | 0.202701 |
| 4 | Metrosideros_ID ~ 1                                      | -108.469 | 1 | 9.3548   | 0.003007 |
| 5 | Metrosideros_ID ~<br>Residency                           | -104.513 | 5 | 9.441782 | 0.002879 |
| 6 | Metrosideros_ID ~<br>Gender                              | -107.96  | 2 | 10.33703 | 0.00184  |
| 7 | Metrosideros_ID ~<br>Metrocideros_Density                | -108.397 | 2 | 11.21047 | 0.001189 |
| 8 | Metrosideros_ID ~<br>Age                                 | -106.229 | 7 | 16.87379 | 7.00E-05 |

Table S2: showing different linear models tried to assess if knowledge of *Pennisetum setaceum* is correlated with plant densities in different towns. The models are ordered by their relative AIC and the best selected one is highlighted in bold.

| Model number | Model description                                           | Log likelihoods | Number of parameters | delta.aics | Weight (wi)     |
|--------------|-------------------------------------------------------------|-----------------|----------------------|------------|-----------------|
| <b>1</b>     | <b>Pennisetum_ID ~ Education + Pennisetum_density + Age</b> | <b>-100.351</b> | <b>14</b>            | <b>0</b>   | <b>0.569819</b> |
| 2            | Pennisetum_ID ~ Residency + Education + Pennisetum_density  | -96.8114        | 18                   | 0.921027   | 0.359533        |
| 3            | Pennisetum_ID ~ Age                                         | -110.189        | 7                    | 5.676259   | 0.033354        |
| 4            | Pennisetum_ID ~ Education + Pennisetum_density              | -109.316        | 8                    | 5.93041    | 0.029374        |
| 5            | Pennisetum_ID ~ Education                                   | -111.833        | 7                    | 8.964689   | 0.006443        |
| 6            | Pennisetum_ID ~ 1                                           | -120.169        | 1                    | 13.63557   | 0.000623        |
| 7            | Pennisetum_ID ~ Gender                                      | -119.754        | 2                    | 14.80664   | 0.000347        |
| 8            | Pennisetum_ID ~ Residency                                   | -116.985        | 5                    | 15.26824   | 0.000276        |
| 9            | Pennisetum_ID ~ Pennisetum_density                          | -120.166        | 2                    | 15.63004   | 0.00023         |

Supplementary information S4 –: Summary of the parametric variables used in the analyses performed at different scales, their questions/explanation and variable type. The original wording and questions are given in a Supplementary material file 1.

| Predictor Variable                                      | Question/Explanation                                                                  | Variable Type                                                                                                                    |
|---------------------------------------------------------|---------------------------------------------------------------------------------------|----------------------------------------------------------------------------------------------------------------------------------|
| Awareness of the term IAS                               | <i>“do you know what an invasive alien species is?: if yes, describe what IAS is”</i> | Categorical: yes/no<br>no= (person did not provide the correct definition);<br>yes = (person provided the correct definition)    |
| Self-estimated knowledge of <i>Metrosideros excelsa</i> | Do you know this tree? (shown on a photograph)                                        | Categorical yes/no<br>no= (person did not provide the correct species name);<br>yes = (person provided the correct species name) |
| Self-estimated knowledge of <i>Pennisetum setaceum</i>  | Do you know this tree? (shown on a photograph)                                        | Categorical: yes/no no= (person did not provide the correct species name); yes = (person provided the correct species name)      |
| Alien plant density                                     | How much people know in relation to the number of alien plant species in their towns  | Continuous                                                                                                                       |
| Age                                                     | Respondent's age                                                                      | Continuous: <20 years; 20-29 years;30-39 years;40-49 years;50-59 years;60-69 years;60-69 years;70-80 years                       |
| Gender                                                  | Respondents' gender                                                                   | Categorical: Male/female                                                                                                         |
| Education level                                         | Whether respondents were educated or not                                              | Categorical. Categories: Bachelor's degree, Honours degree, National Diploma, Matric, High School, Primary and not disclosed)    |

|           |                                         |                                                                                         |
|-----------|-----------------------------------------|-----------------------------------------------------------------------------------------|
| Residency | Respondent's resident time in the areas | Categorical. Categories: Just visiting,<1year;1-5 year;5-10 years;10-20 years;>20 years |
|-----------|-----------------------------------------|-----------------------------------------------------------------------------------------|

Supplementary information S5. Demographic details for the surveyed population from eight towns along the Berg River Catchment.

| Town                            | Total respondents (n) | Male/Female (n) | Median age | Average residence time lowest/highest (yr) | Lowest/Highest Level of education |
|---------------------------------|-----------------------|-----------------|------------|--------------------------------------------|-----------------------------------|
| Gouda                           | 39                    | 19/20           | 20         | 1-5/>20                                    | Grade 5/Grade 12                  |
| Hermon                          | 40                    | 11/29           | 37         | 1-5/>20                                    | Grade 7/Grade 12                  |
| Morreensburg                    | 39                    | 12/27           | 39         | 1-5/>20                                    | Grade 8/ Bachelor's Degree        |
| Riebeek Kasteel                 | 41                    | 17/24           | 39         | 1-5/>20                                    | Grade 12                          |
| Riebeek West                    | 38                    | 10/28           | 38         | <1/>20                                     | Grade 2/Grade 12                  |
| Tulbagh                         | 30                    | 19/11           | 35         | <1/>20                                     | Grade 4/ National Diploma         |
| Wolseley                        | 25                    | 19/6            | 31         | 1-5/>20                                    | Grade 6/ National Diploma         |
| Hopefield                       | 10                    | 2/8             | 43         | 1-5/>20                                    | High school/ National diploma     |
| <b>Total of all respondents</b> | <b>262</b>            |                 |            |                                            |                                   |

Supplementary information S6: Significance levels of candidate models with categorical variables explaining correlation between knowledge of IAS (marked with \* in Table S1).

What\_is\_invasive ~ Education

|                             | Estimate | Std.<br>Error | z      | value   | Pr(> z ) |
|-----------------------------|----------|---------------|--------|---------|----------|
| (Intercept)                 | 1.099    | 1.155         | 0.951  | 0.34139 |          |
| Education: High school      | -2.691   | 1.197         | -2.248 | 0.0246  | *        |
| Education: Honours degree   | 13.467   | 882.744       | 0.015  | 0.98783 |          |
| Education: Matric           | -2.291   | 1.187         | -1.929 | 0.05371 | .        |
| Education: National diploma | 1.204    | 1.56          | 0.772  | 0.44022 |          |
| Education: Primary          | -4.682   | 1.537         | -3.047 | 0.00231 | **       |
| Education: refused          | -4.127   | 1.297         | -3.182 | 0.00147 | **       |

What\_is\_invasive ~ Location

|                           | Estimate | Std.<br>Error | z      | value    | Pr(> z ) |
|---------------------------|----------|---------------|--------|----------|----------|
| (Intercept)               | -2.48491 | 0.60093       | -4.135 | 3.55E-05 | ***      |
| Location: Hermon          | -1.17865 | 1.1776        | -1.001 | 0.31688  |          |
| Location: Hopefield       | 2.48491  | 0.87242       | 2.848  | 0.0044   | **       |
| Location: Moorreesburg    | 1.67398  | 0.69389       | 2.412  | 0.01585  | *        |
| Location: Riebeek-Kasteel | -16.0812 | 1018.665      | -0.016 | 0.9874   |          |
| Location: Riebeek-West    | 0.02817  | 0.8503        | 0.033  | 0.97357  |          |
| Location: Tulbagh         | 2.21664  | 0.70488       | 3.145  | 0.00166  | **       |
| Location: Wolseley        | 2.07944  | 0.72648       | 2.862  | 0.00421  | **       |

What\_is\_invasive ~ Age

|             | Estimate | Std.<br>Error | z      | value    | Pr(> z ) |
|-------------|----------|---------------|--------|----------|----------|
| (Intercept) | -2.2246  | 0.5263        | -4.227 | 2.37E-05 | ***      |
| Age: 18-29  | 0.8237   | 0.5918        | 1.392  | 0.164    |          |
| Age: 30-39  | 0.9561   | 0.6476        | 1.476  | 0.14     |          |
| Age: 40-49  | 0.9253   | 0.6468        | 1.431  | 0.153    |          |
| Age: 50-59  | 0.5382   | 0.7169        | 0.751  | 0.453    |          |
| Age: 60-69  | 0.3528   | 0.9241        | 0.382  | 0.703    |          |
| Age: >80    | 0.8383   | 1.2357        | 0.678  | 0.498    |          |

What\_is\_invasive ~ Residency

|                  | Estimate  | Std.<br>Error | z      | value    | Pr(> z ) |
|------------------|-----------|---------------|--------|----------|----------|
| (Intercept)      | 1.88E-14  | 1.00E+00      | 0      | 1.00E+00 |          |
| -                |           |               |        |          |          |
| Residency >20    | 1.64E+00  | 1.03E+00      | -1.591 | 0.1115   |          |
| Residency: 1-5   | -4.42E-01 | 1.09E+00      | -0.406 | 0.6845   |          |
| -                |           |               |        |          |          |
| Residency: 10-20 | 2.21E+00  | 1.06E+00      | -2.085 | 0.0371   | *        |
| Residency: 5-10  | -8.65E-01 | 1.09E+00      | -0.797 | 0.4254   |          |

What\_is\_invasive ~ Gender + Residency + Age + Education + alien\_density

|                             | Estimate  | Std.<br>Error | z      | value    | Pr(> z ) |
|-----------------------------|-----------|---------------|--------|----------|----------|
| (Intercept)                 | 2.70E+00  | 2.13E+00      | 1.263  | 0.206491 |          |
| GenderMale                  | 1.12E+00  | 4.32E-01      | 2.589  | 0.009613 | **       |
| Residency >20               | -7.82E-01 | 1.33E+00      | -0.589 | 0.556061 |          |
| Residency: 1-5              | 1.16E-01  | 1.42E+00      | 0.081  | 0.935316 |          |
| Residency: 10-20            | -8.28E-01 | 1.41E+00      | -0.586 | 0.558021 |          |
| Residency: 5-10             | 1.37E-02  | 1.41E+00      | 0.01   | 0.992224 |          |
| Age: 18-29                  | -3.51E-03 | 8.49E-01      | -0.004 | 0.996699 |          |
| Age: 30-39                  | -1.88E-01 | 9.30E-01      | -0.202 | 0.84007  |          |
| Age: 40-49                  | 2.96E-01  | 9.68E-01      | 0.306  | 0.759801 |          |
| Age: 50-59                  | 7.48E-01  | 1.05E+00      | 0.712  | 0.47664  |          |
| Age: 60-69                  | 7.24E-01  | 1.20E+00      | 0.606  | 0.544742 |          |
| Age: >80                    | -1.53E+00 | 2.19E+00      | -0.7   | 0.483695 |          |
| Education: High school      | -2.59E+00 | 1.44E+00      | -1.797 | 0.072261 | .        |
| Education: Honours degree   | 1.33E+01  | 1.46E+03      | 0.009  | 0.992698 |          |
| Education: Matric           | -2.45E+00 | 1.45E+00      | -1.687 | 0.091524 | .        |
| Education: National diploma | 1.01E+00  | 1.81E+00      | 0.557  | 0.577474 |          |
| Education: Primary          | -4.83E+00 | 1.80E+00      | -2.683 | 0.007294 | **       |
| Education: refused          | -3.82E+00 | 1.55E+00      | -2.458 | 0.013974 | *        |
| alien_density               | -9.31E-01 | 2.80E-01      | -3.328 | 0.000876 | ***      |

What\_is\_invasive ~ Gender + Education

|                             | Estimate | Std.<br>Error | z      | value   | Pr(> z ) |
|-----------------------------|----------|---------------|--------|---------|----------|
| (Intercept)                 | 0.5837   | 1.2002        | 0.486  | 0.62674 |          |
| GenderMale                  | 1.2157   | 0.3945        | 3.082  | 0.00206 | **       |
| Education: High school      | -2.792   | 1.2401        | -2.251 | 0.02436 | *        |
| Education: Honours degree   | 12.7666  | 882.7442      | 0.014  | 0.98846 |          |
| EducationMatric             | -2.2978  | 1.2279        | -1.871 | 0.0613  | .        |
| Education: National diploma | 1.2044   | 1.598         | 0.754  | 0.45101 |          |
| EducationPrimary            | -4.7979  | 1.5732        | -3.05  | 0.00229 | **       |
| Educationrefused            | -4.3546  | 1.3416        | -3.246 | 0.00117 | **       |

#### What\_is\_invasive ~ Gender + Education + alien\_density

|                             | Estimate  | Std.<br>Error | z         | value    | Pr(> z ) |
|-----------------------------|-----------|---------------|-----------|----------|----------|
| (Intercept)                 | 2.26E+00  | 1.44E+00      | 1.567     | 1.17E-01 |          |
| Gender: Male                | 1.1905    | 4.08E-01      | 2.92E+00  | 0.00355  | **       |
| Education: High school      | -2.93E+00 | 1.39E+00      | -2.118    | 0.0342   | *        |
| Education: Honours degree   | 1.25E+01  | 8.83E+02      | 0.014     | 0.98872  |          |
| Education: Matric           | -2.6466   | 1.38E+00      | -1.92E+00 | 0.05545  | .        |
| Education: National diploma | 0.7788    | 1.7094        | 0.456     | 0.64869  |          |
| Education: Primary          | -5.3206   | 1.7101        | -3.111    | 0.00186  | **       |
| Education: refused          | -4.1995   | 1.4892        | -2.82     | 0.0048   | **       |
| alien_density               | -0.8051   | 0.2509        | -3.208    | 0.00134  | **       |
